# Supplementary material for: Circulating Metabolites as Biomarkers of Disease in Patients with Mesial Temporal Lobe Epilepsy
Source: Metabolites. 2022 May 17;12(5):446. doi: 10.3390/metabo12050446 (PMC9148034; doi:10.3390/metabo12050446)
Supplement: Supplementary file 1 [file metabolites-12-00446-s001.zip]

Archive with 4 entries (4 files):
- Supplementary file 1.pdf
- Supplementary file 2.pdf
- Supplementary Table S2_genes_overlap.xlsx
- Supplementary Table S3 _ overlap_gsea_drxrp.xlsx
